# Supplementary material for: An automated method for finding molecular complexes in large protein interaction networks
Source: Springer Nature journal article supplement (doi:10.1186/1471-2105-4-2), 2003-01-13

- Chromatin/chromosome structure
- Protein degradation
- Cell cycle control
- RNA processing/modification, RNA splicing
- Unknown

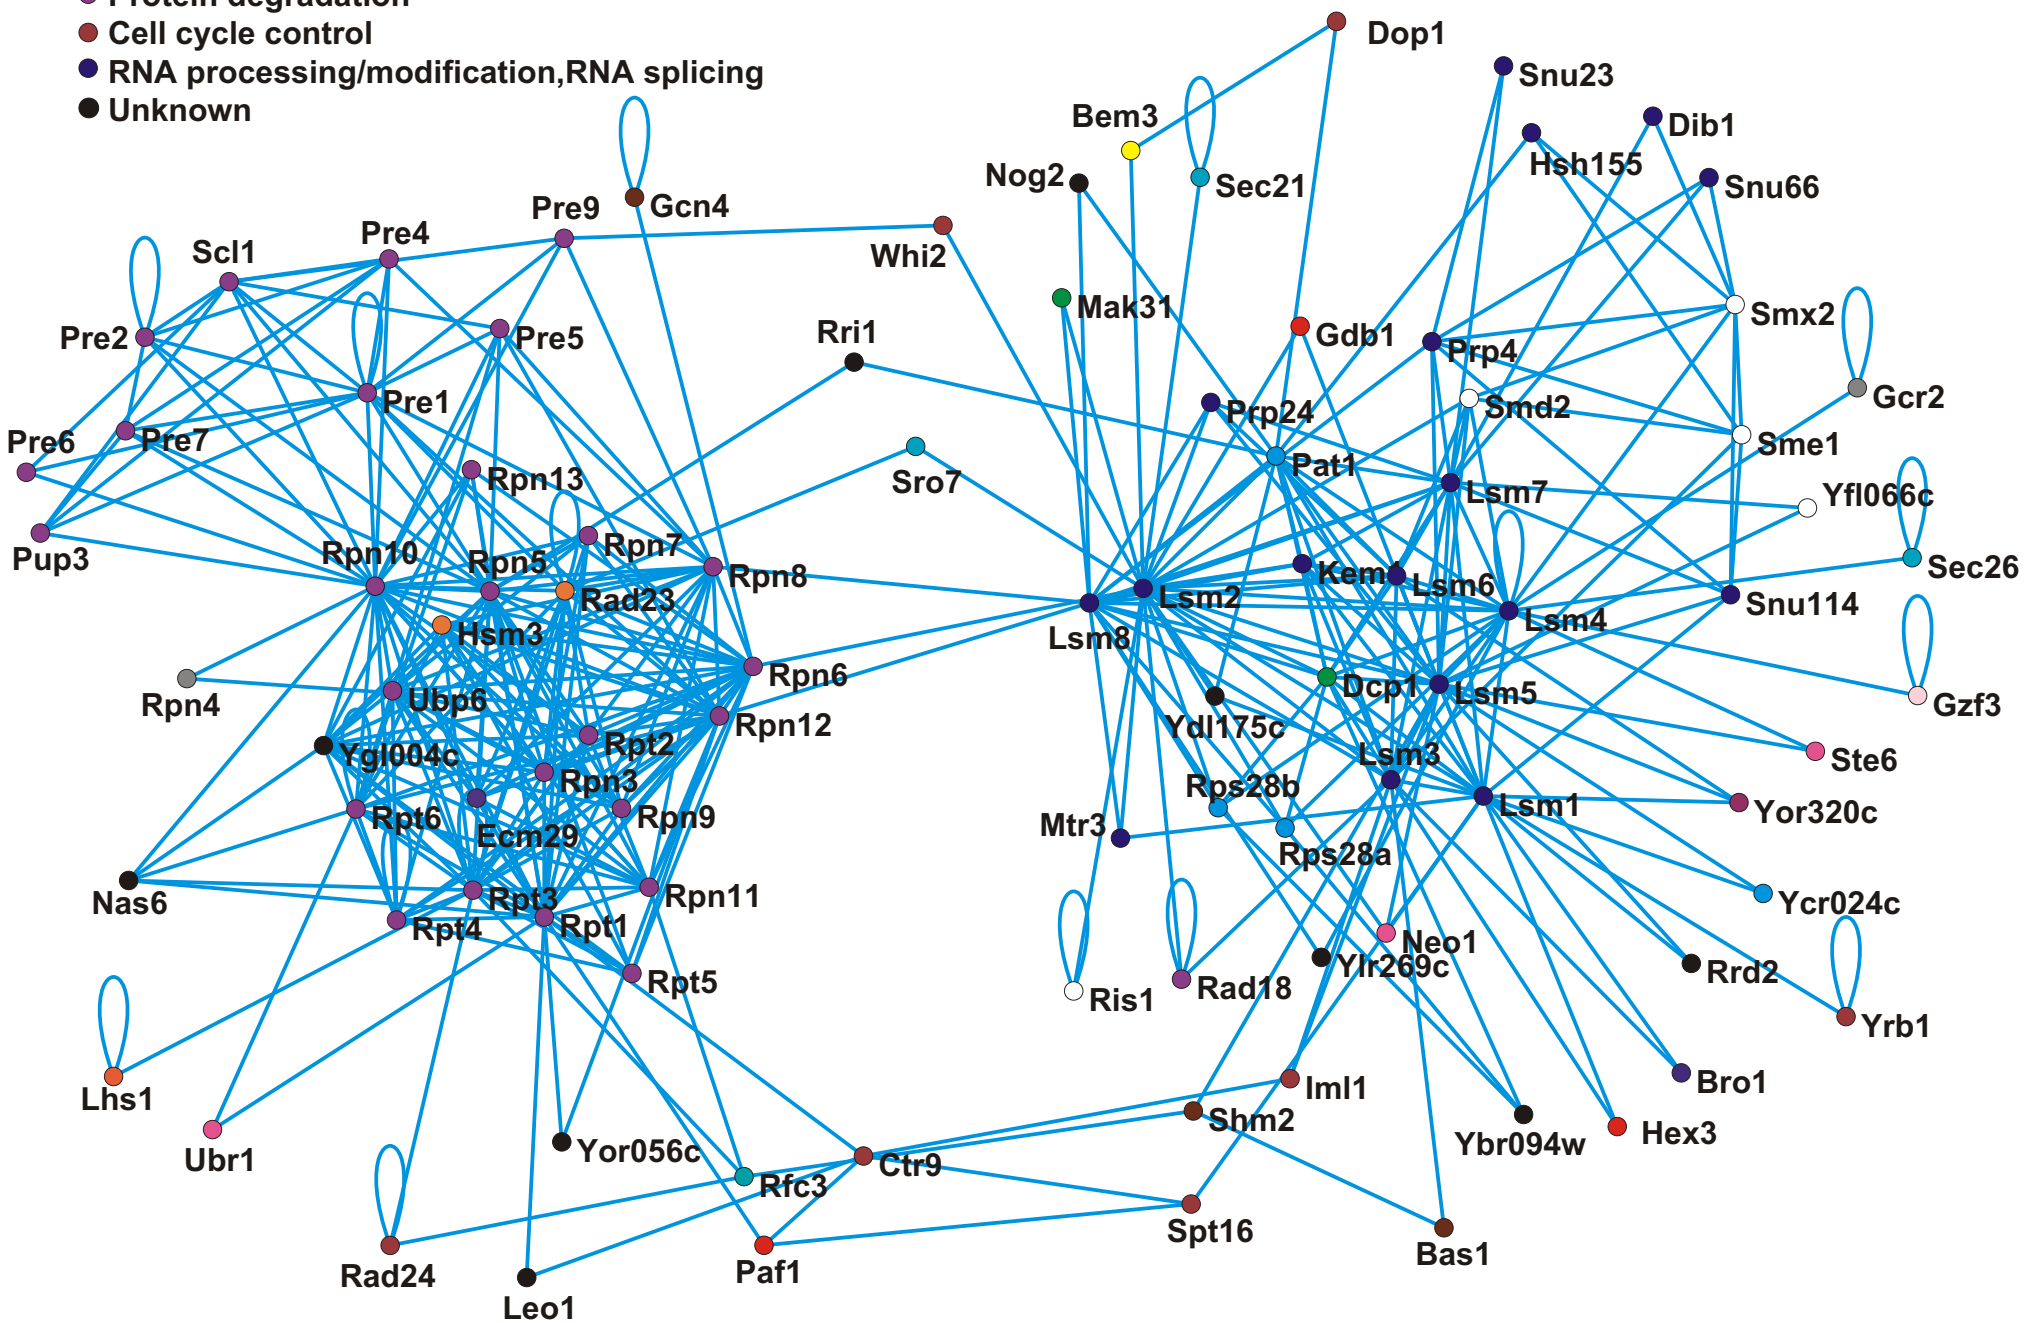

Supplement: 12859_2002_52_MOESM11_ESM.pdf [file 12859_2002_52_MOESM11_ESM.pdf]
