# Supplementary material for: An automated method for finding molecular complexes in large protein interaction networks
Source: Springer Nature journal article supplement (doi:10.1186/1471-2105-4-2), 2003-01-13
Supplement: 12859_2002_52_MOESM13_ESM.pdf [file 12859_2002_52_MOESM13_ESM.pdf]

mRNA  
Cleavage/  
Polyadenylation

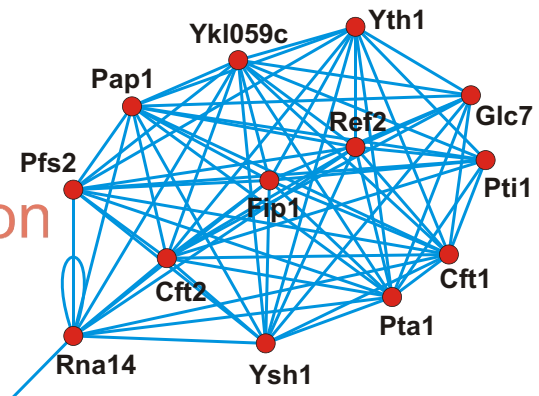

Lsm Complex

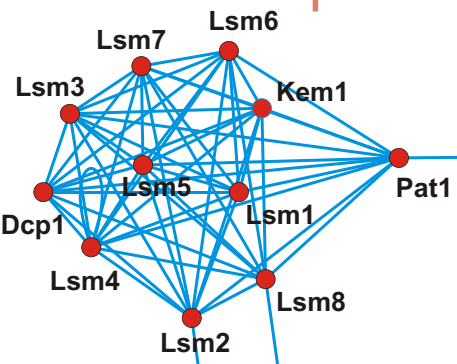

SAGA  
Complex

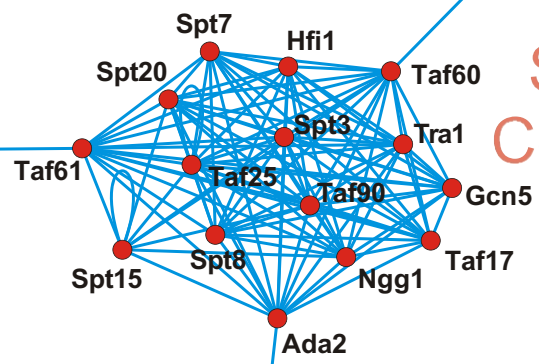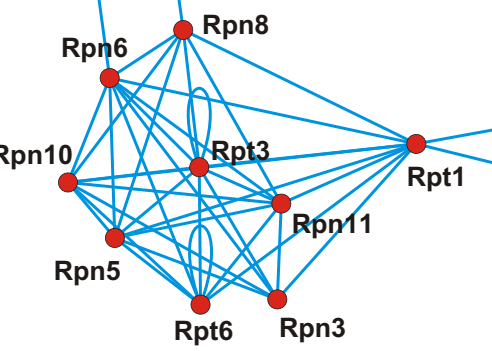

19S Proteasome

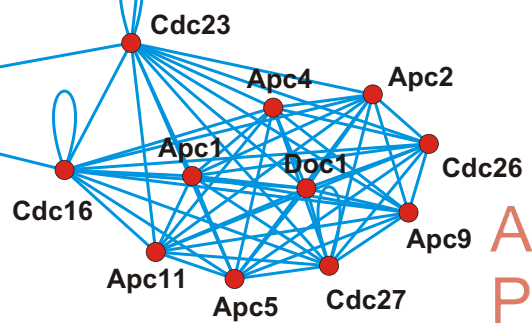

Anaphase  
Promoting  
Complex
